# Supplementary material for: σE-dependent small RNAs of Salmonella respond to membrane stress by accelerating global omp mRNA decay
Source: PubMed Central journal article supplement (PMC1804206; doi:10.1111/j.1365-2958.2006.05524.x), 2006-12

## Supporting Online Material

### $\sigma^E$ -dependent sRNAs of *Salmonella* respond to membrane stress by accelerating global *omp* mRNA decay

Kai Papenfort, Verena Pfeiffer, Franziska Mika, Sacha Lucchini, Jay C.D. Hinton,  
Jörg Vogel<sup>#</sup>

<sup>#</sup> To whom correspondence should be addressed. E-mail: vogel@mpiib-berlin.mpg.de

#### **This supplement contains:**

Supplementary Materials and Methods

Fig. S1

Tables S1, S2, S3

## Supplementary Materials and Methods

### *Sample preparation for microarray experiments*

3 OD aliquotes were removed, treated with 0.2 vol of stop solution (95% EtOH; 5% water saturated Phenol), snap-frozen in liquid nitrogen and stored at -80°C. For RNA extraction the cells were thawed on ice and pelleted by centrifugation (10 min, 4000 rpm, 4°C). RNA was isolated using the Promega SV total RNA purification kit as described at [www.ifr.ac.uk/safety/microarrays/protocols.html](http://www.ifr.ac.uk/safety/microarrays/protocols.html). RNA concentration was determined on a Nanodrop machine (NanoDrop Technologies), and RNA quality was assessed using the RNA Laboratory-on-a-Chip (Agilent Technologies, Palo Alto, CA) as directed by the manufacturers. Experiments were performed in triplicates.

### *Microarray data generation*

The microarrays used in this study include PCR products of all the genes present in the sequenced *S. typhimurium* strain LT2. In addition, we added 229 genes specific to *S. typhimurium* strain SL1344. Details of all the amplicons can be found at <http://www.ifr.ac.uk/Safety/MolMicro/pubs.html>. Our experimental design involves the use of *Salmonella enterica* serovar Typhimurium genomic DNA as the co-hybridized control for one channel on all microarrays. This method has the advantage of allowing the direct comparison of multiple samples. Total RNA and chromosomal DNA were labelled by random priming according to the protocols described at <http://www.ifr.bbsrc.ac.uk/safety/microarrays/protocols.html>. Briefly, 16 µg RNA were reverse transcribed and labelled with Cy3-conjugated dCTP (Pharmacia) using 200U of Stratascript (Stratagene) and random octamers (Invitrogen). Chromosomal DNA (400 ng) was labelled with Cy5-dCTP using the Klenow fragment. After labelling, each Cy3-labelled cDNA sample was combined with Cy5-labelled chromosomal DNA and hybridised to a microarray overnight at 65°C. After hybridisation, slides were washed and scanned using a GenePix 4000A scanner (Axon Instruments, Inc.). Fluorescent spots and the local background intensities were identified and quantified using Bluefuse software (BlueGnome, Oxford). To compensate for unequal dye incorporation, data centring to zero was performed for each block (one block being defined as the group of spots printed by the same pin). We considered genes to be differentially expressed if they displayed  $\geq 3$ -fold changes in all replicates and were statistically significantly different using Significance Analysis of Microarrays (Tusher et al. 2001). The final list included a number of genes whose gene expression is highly sensitive to small changes in growth conditions (data not shown). The consequence is that those genes have a higher probability to be false positives. Quantitative RT-PCR on independent RNA samples confirmed that the gene expression level of those genes (*cydA*, *napC*, *narK*, *nirB*) was not dependent on RybB (data not shown). Those genes were therefore excluded from further analysis. Data visualisation and data mining was performed using GeneSpring 7.3 (Agilent).

## Supplementary Tables & Figures

**Table S1:** Oligodeoxynucleotides used in this study.

| Name     | Sequence in 5' → 3' direction                                              |
|----------|----------------------------------------------------------------------------|
| JVO-0019 | AAATAAACTGAACCTTTGTTCCGGGGCGAGTCTGAGTATATGAAAGACGTGTAGGCTGGAGCTGCTTC       |
| JVO-0020 | GGCGGATACCGAGCCGTTTGCCCGCTGGCTTGCAAAACACGCCTGACCCAGGTCCATATGAATATCCTCCTTAG |
| JVO-0021 | GTTTTTCTCGAGCAGATCAAACACGGTGATT                                            |
| JVO-0023 | GTTTTTCTAGAGCCGCTGGAGATTTTACA                                              |
| JVO-0236 | GAAAGACGCGCATTGT                                                           |
| JVO-0266 | GTTTTTTTTTAATACGACTCACTATAGGGAGGCACGGAGTGGCCAAA                            |
| JVO-0279 | GTTTGCCTTTAAGTGAAAAATTTTGCCAATAGGTCGAACTTTTCGTTAAGGTCCATATGAATATCCTCCTTAG  |
| JVO-0280 | CGTTGGGCAACAAAAACCCACCAACCTTGAACCGAAATGGCGGGTTGAGTGTAGGCTGGAGCTGCTTC       |
| JVO-0281 | GTTTTTCTCGAGCGCGATGGAATCAT                                                 |
| JVO-0282 | GTTTTTCTAGAGCCCGAGTGTCAAT                                                  |
| JVO-0322 | CTACGCGTTTCACTTCTGAGTTC                                                    |
| JVO-0397 | CGGTAGAGTAACTATTGAGCAGAT                                                   |
| JVO-0398 | GTTTTTTTTTAATACGACTCACTATAGGGAGGCCTAACCAGTCGTAGC                           |
| JVO-0430 | GTTTTTATGCATAGACACATAAAGACACCAAACCTC                                       |
| JVO-0717 | GTTTTGCTAGCTGGTACCAGGAGGG                                                  |
| JVO-0719 | GTTTTATGCATGCCGACTGGTTAATGAG                                               |
| JVO-0900 | GGAGAAACAGTAGAGAGTTGC                                                      |
| JVO-0901 | TTTTTCTAGATTAATCAGAACGCAGA                                                 |
| JVO-0906 | 5'P-GCCACTGCTTTTCTTTGA                                                     |
| JVO-0932 | CCACCGCTCAATTTGC                                                           |
| JVO-0933 | CGATCTCTCCAGCGATT                                                          |
| JVO-1057 | GTTTTTTTTAATACGACTCACTATAGGCCATTGACAAACGC                                  |
| JVO-1058 | CGTGAACCTTACCCTACA                                                         |
| JVO-1074 | AGATCAGAAAGCCTTTAACTTACTGGTAGTGCCTACCAGCATAAAGTGGTCCATATGAATATCCTCCTTAG    |
| JVO-1075 | TATCTCTTCATAGCTCAGGCCATCCAGCTCCCGTAAGGTGATTGCCATACGTGTAGGCTGGAGCTGCTTC     |
| JVO-1076 | GATAAGACCTGTCTACAACATGA                                                    |
| JVO-1077 | TAACTCTCCAGGTTTTCTG                                                        |
| JVO-1090 | CTTCATTCACAATGATGGCCC                                                      |
| JVO-1091 | TCGTAGCCCATTTCAAAGCC                                                       |
| JVO-1092 | CCTACGGCGCTGACAACCTTA                                                      |
| JVO-1093 | TAACGCGAAGTCCAGACCATC                                                      |
| JVO-1094 | ACGTTCTGCCAGAGTTTGGTG                                                      |
| JVO-1095 | CCAGGCCAAAGAAGTCAGTGTT                                                     |
| JVO-1117 | TCAGCCATTTGTGCGCTT                                                         |
| JVO-1118 | TTCAGGATCGACAACGCCTT                                                       |
| JVO-1186 | TTTTCTCGAGTTAATACGACTCACTATAGGCCATTGACAAACG                                |
| JVO-1187 | GACACCGTGAATCGCA                                                           |
| JVO-1188 | GTTTTTTTTTAATACGACTCACTATAGGGAGGCAGTGATGCCGTAGT                            |
| JVO-1195 | GGATGCCTTTGATTCAAC                                                         |
| JVO-1196 | GTTTTTTAATACGACTCACTATAGGGAGGTCTGATCGCCATCTT                               |
| JVO-1197 | GAACAAATGTGATCTGTATTAGATC                                                  |
| JVO-1198 | GTTTTTTAATACGACTCACTATAGGGAGGTCTGACGGTTGCC                                 |
| JVO-1199 | TCCATGAACCTTCATAGAATAGTATC                                                 |
| JVO-1200 | GTTTTTTTTAATACGACTCACTATAGGGAGGTGAGTTTGTGGCC                               |
| JVO-1202 | GTTTTTTAATACGACTCACTATAGGGAGGCTTACCCTACAGATCCAG                            |
| JVO-1203 | GCCACTGGTCTGATTTCTA                                                        |
| JVO-1204 | GTTGTTTTAATACGACTCACTATAGGGAGGCCAGGAAGAAAAAT                               |
| JVO-1205 | GTTGATGGGCTCCACAA                                                          |
| JVO-1230 | GTTTTGACGTCGCAGATCAAACACGGT                                                |
| JVO-1231 | GTTTTGCTAGCGTCTTTCATATACTCAGAC                                             |
| JVO-1232 | GTTTTGACGTCGCGCAGTAATATTCCA                                                |
| JVO-1233 | GTTTTGCTAGCAGTGGCAATAGGTATG                                                |
| JVO-1234 | AGGTTTGGCATTGTGCGCT                                                        |
| JVO-1235 | CTTTTTCGAGCATCGGTGC                                                        |
| JVO-1236 | ACTATTGAGTCCCTCCCGGAAG                                                     |
| JVO-1237 | ACCGGACAATCCATGATAGCC                                                      |
| JVO-1242 | GTTTTTTTTAATACGACTCACTATAGGCCACTGCTTTTCTTTGA                               |
| JVO-1243 | AACCCACCAACCTTGAA                                                          |
| JVO-1244 | GTTTTTTTTAATACGACTCACTATAGGATGCCTTTGATTCAA                                 |
| JVO-1245 | GTTGCCGTCTTTGTATAAAAT                                                      |

|          |                                             |
|----------|---------------------------------------------|
| JVO-1246 | GTTTTTTTTAATACGACTCACTATAGGCCGACTGGTTAATGAG |
| JVO-1247 | GGTCTAATTTGTTGCCGT                          |
| JVO-1328 | CGCAAACGCAGCAGAAATT                         |
| JVO-1329 | TTTTACTATCGCCGGTCGTTG                       |
| JVO-1330 | GTCTGAACTTCGCGTTGCAAT                       |
| JVO-1331 | CACCGTTAGCGTTCTTCACGT                       |
| JVO-1332 | CCTGTACGGCAAAGTTGATGG                       |
| JVO-1333 | CGTTAATCTGCGTTTCGCCT                        |
| JVO-1334 | ATTCCAGCAGCAAAGTGCCT                        |
| JVO-1335 | GGACAGCCCGGCATTTTTA                         |
| JVO-1393 | CGAACGTCCATTTTGTCCG                         |
| JVO-1394 | CCGGCGTATGTGTCGTTAAAC                       |
| PBADFW   | ATGCCATAGCATTTTATCC                         |
| PBADREV  | TTATCAGACCGCTTCTGC                          |

**Table S2:** Microarray results (provided as an separate EXCEL file).

**Table S3:** Probes for Northern detection and hybridization conditions.

| gene        | probe                                                                           | hybridization temperature (°C) / buffer |
|-------------|---------------------------------------------------------------------------------|-----------------------------------------|
| <i>micA</i> | Riboprobe generated from PCR product amplified with primers JVO-0236/ JVO-0266  | 42 / RAPIDhyb                           |
| <i>rybB</i> | oligo JVO-1205                                                                  | 45 / RAPIDhyb                           |
| <i>ompA</i> | dsDNA; PCR product amplified with primers JVO-0397 / JVO-0398                   | 65 / RAPIDhyb                           |
| <i>ompC</i> | dsDNA, PCR product amplified with primers JVO-717 / JVO-719                     | 65 / RAPIDhyb                           |
| <i>ompD</i> | Riboprobe generated from PCR product amplified with primers JVO-1057 / JVO-1058 | 70 / RAPIDhyb                           |
| <i>ompF</i> | dsDNA; PCR product amplified with primers JVO-0430 / JVO-1202                   | 68 / RAPIDhyb                           |
| <i>ompN</i> | Riboprobe generated from PCR product amplified with primers JVO-1195 / JVO-1196 | 68 / RAPIDhyb                           |
| <i>ompS</i> | Riboprobe generated from PCR product amplified with primers JVO-1199 / JVO-1200 | 68 / RAPIDhyb                           |
| <i>ompW</i> | Riboprobe generated from PCR product amplified with primers JVO-1197 / JVO-1198 | 68 / RAPIDhyb                           |
| <i>ompX</i> | dsDNA; PCR product amplified with primers JVO-1187 / JVO-1188                   | 68 / RAPIDhyb                           |
| <i>fadL</i> | Riboprobe generated from PCR product amplified with primers JVO-1203 / JVO-1204 | 68 / RAPIDhyb                           |
| <i>sodB</i> | dsDNA; PCR product amplified with JVO-0932 / JVO-0933                           | 68 / RAPIDhyb                           |
| 5S rRNA     | oligo JVO-0322                                                                  | 45 / RotiQuick                          |

**Legend for Supplementary Figure S1:** Northern blot showing that polymyxin B-induced downregulation of *ompD* mRNA in wild-type *Salmonella* is dependent on  $\sigma^E$  activation. RNA samples were taken from polymyxin B-treated wild-type and  $\Delta rpoE$  cells in late exponential phase (OD<sub>600</sub> of 1). Total RNA was prepared prior to (0 min) and after 5 and 10 min of polymyxin B addition.

## Supplementary References

Tusher, V.G., R. Tibshirani, and G. Chu. 2001. Significance analysis of microarrays applied to the ionizing radiation response. *Proc Natl Acad Sci U S A* 98: 5116-21.

**Figure S1**

Papenfort *et al.*, 2006

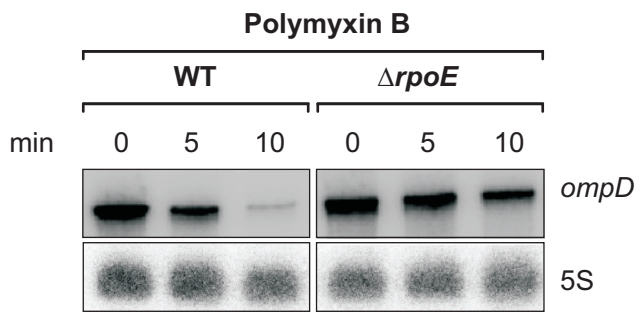

Supplement: mmi0062-1674-S1.pdf [file mmi0062-1674-S1.pdf]
